# Supplementary material
Source: PubMed Central journal article supplement (PMC3429626)
Supplement: NIHMS389017-supplement-01.pdf [file NIHMS389017-supplement-01.pdf]

## **SUPPLEMENTARY DATA**

### **Thermoresponsive nanogels for prolonged duration local anesthesia**

Todd Hoare, Stuart Young, Michael W. Lawlor, and Daniel S. Kohane<sup>\*</sup>

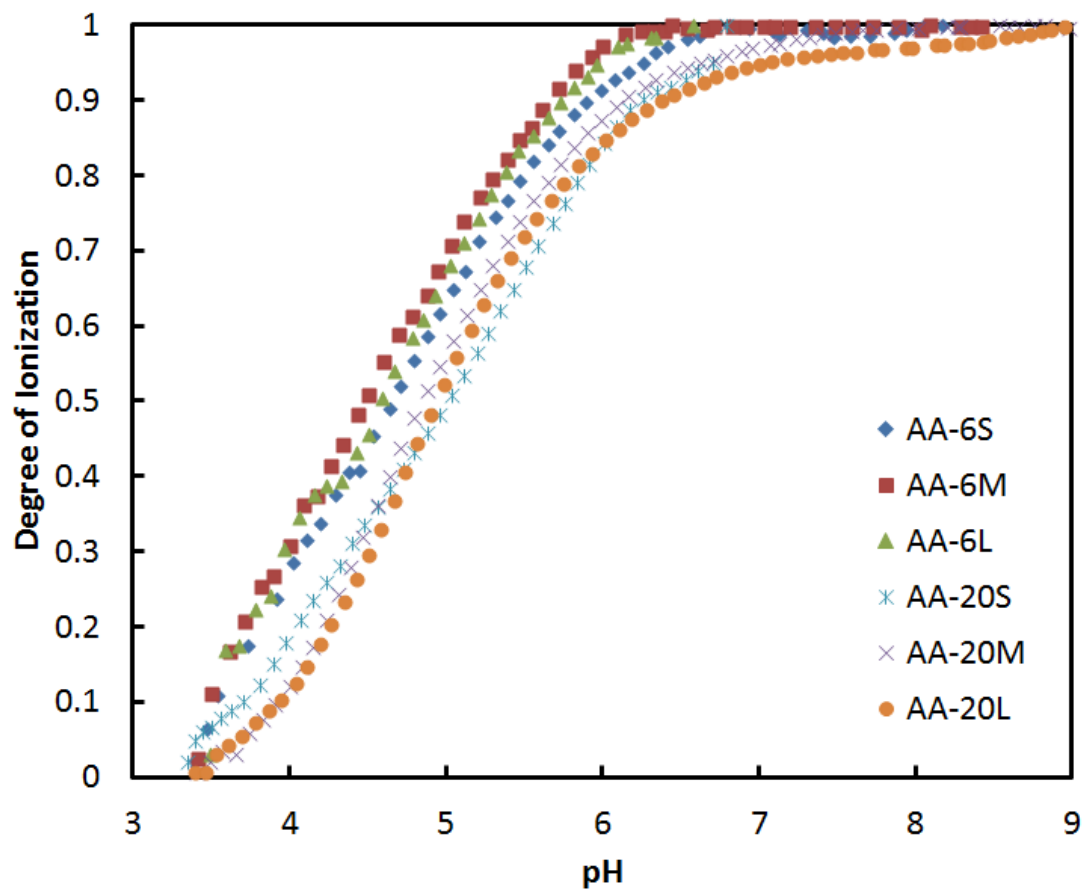

**Figure S1.** Degree of ionization as a function of pH for core acrylic acid-functionalized nanogels tested

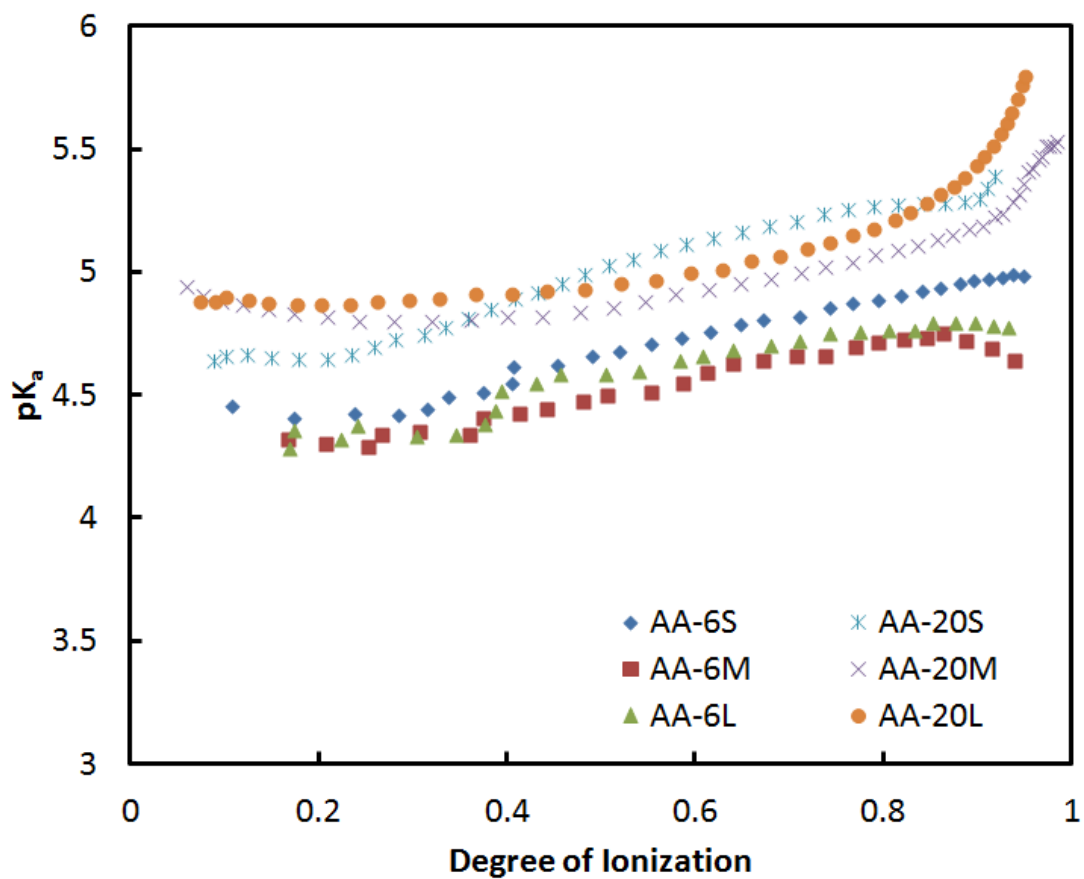

**Figure S2.**  $pK_a$  of core acrylic acid-functionalized nanogels tested as a function of degree of ionization

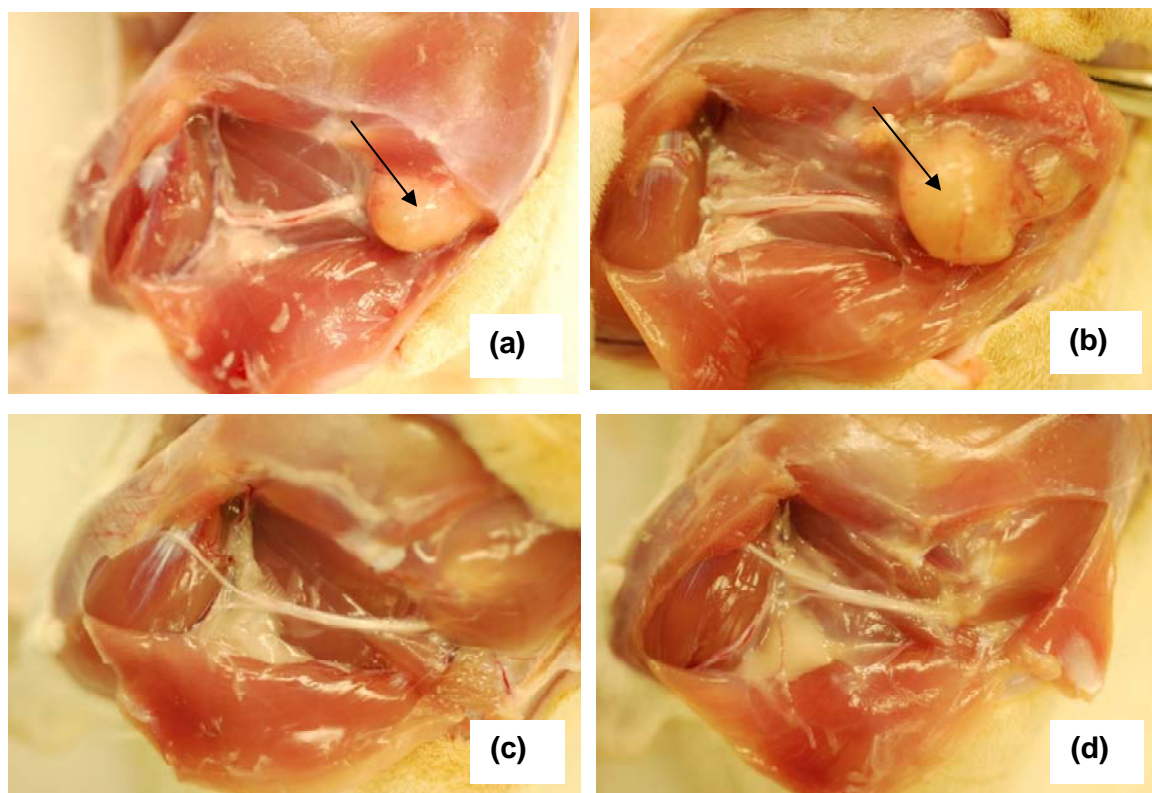

**Figure S3.** Tissue response to sciatic nerve injection of AA-33 nanogels of different sizes (a) AA-33L, 4 days after injection; (b) AA-33L, 2 weeks after injection; (c) AA-33S, 4 days after injection; (d) AA-33S, 2 weeks after injection. Arrows point to the residual nanogel deposit/inflammatory complex.

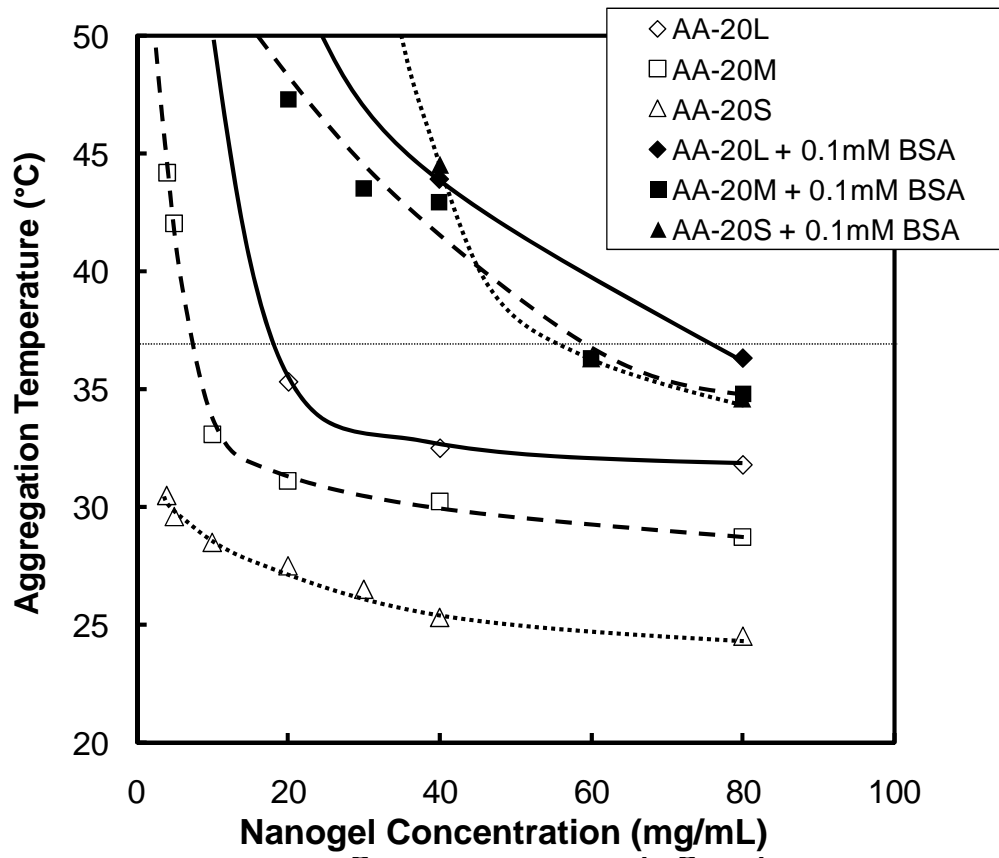

**Figure S4.** Critical aggregation temperature of AA-20 nanogels with varying sizes as measured in saline (0.15M NaCl) in the absence and presence of 0.1mM bovine serum albumin (BSA), representative of the total protein concentration in interstitial fluid ( $n = 4$ )

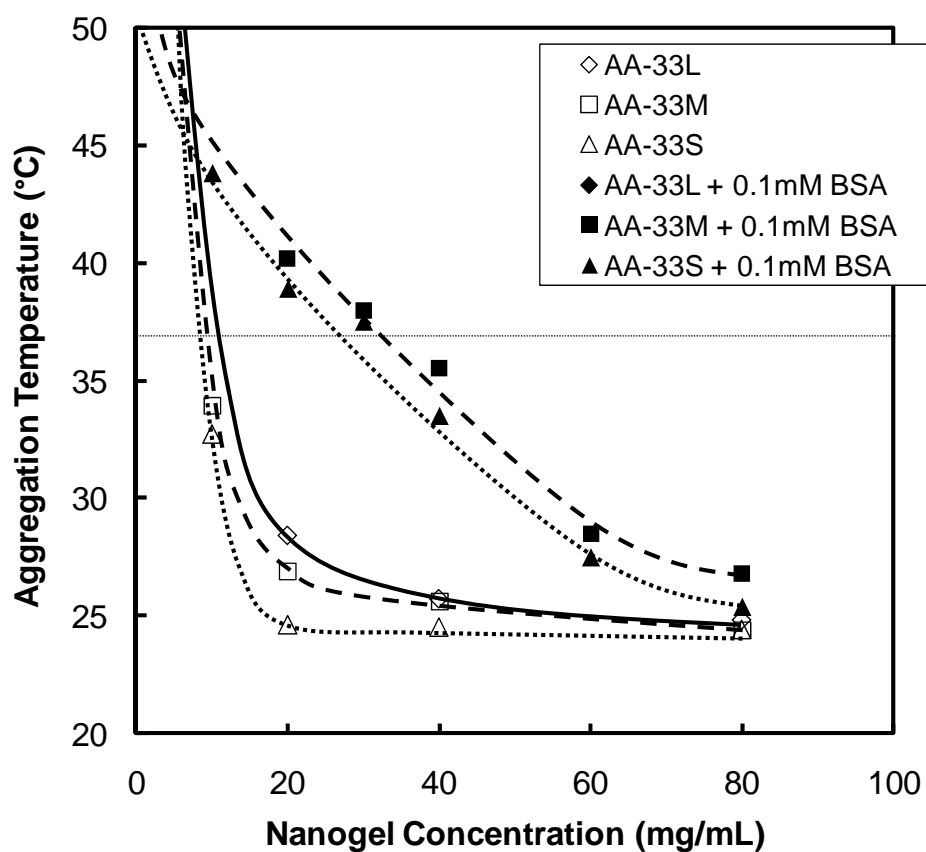

**Figure S5.** Critical aggregation temperature of AA-33 nanogels with varying sizes as measured in saline (0.15M NaCl) in the absence and presence of 0.1mM bovine serum albumin (BSA), representative of the total protein concentration in interstitial fluid ( $n = 4$ )
